# Supplementary material for: BNT162b2 COVID-19 Vaccines in Children, Adolescents and Young Adults with Cancer—A 1-Year Follow-Up
Source: MDPI journal article supplement (doi:10.3390/vaccines11050989), 2023-05-16
Supplement: s1 [file s1]

**Table S1.** Serology per month post vaccination.

|                           | <b>Median<br/>(BAU/ml)</b> | <b>Q1<br/>(BAU/ml)</b> | <b>Q3<br/>(BAU/ml)</b> | <b>Covid-19<br/>infection</b> | <b>N</b> |
|---------------------------|----------------------------|------------------------|------------------------|-------------------------------|----------|
| Month 0 (day 0)           | 26                         | 26                     | 26                     | 0                             | 20       |
| Month 1 (day 1 to 30)     | 173                        | 26                     | 498                    | 2                             | 21       |
| Month 2 (day 31 to 60)    | 204                        | 44                     | 2252                   | 0                             | 12       |
| Month 3 (day 61 to 90)    | 1778                       | 1379                   | 3099                   | 0                             | 7        |
| Month 4 (day 91 to 120)   | 431                        | 166                    | 1578                   | 0                             | 10       |
| Month 5 (day 121 to 150)  | 904                        | 150                    | 1720                   | 2                             | 8        |
| Month 6 (day 151 to 180)  | 895                        | 367                    | 3219                   | 1                             | 5        |
| Month 7 (day 181 to 210)  | 376                        | 82                     | 708                    | 0                             | 11       |
| Month 8 (day 211 to 240)  | 88                         | 88                     | 88                     | 0                             | 1        |
| Month 9 (day 241 to 270)  | 216                        | 162                    | 2088                   | 1                             | 4        |
| Month 10 (day 271 to 300) | 3349                       | 816                    | 6007                   | 0                             | 4        |
| Month 11 (day 301 to 330) | 1198                       | 668                    | 7419                   | 1                             | 3        |
| Month 12 (day 331 to 360) | 6437                       | 3524                   | 7058                   | 0                             | 3        |
| > Month 12 (> day 361)    | 5878                       | 696                    | 7138                   | 0                             | 8        |

**Table S2.** Serology per month post vaccination (exclusion of patients with COVID-19 infection).

|                           | <b>Median<br/>(BAU/ml)</b> | <b>Q1<br/>(BAU/ml)</b> | <b>Q3<br/>(BAU/ml)</b> | <b>N</b> |
|---------------------------|----------------------------|------------------------|------------------------|----------|
| Month 0 (day 0)           | 26                         | 26                     | 25,6                   | 19       |
| Month 1 (day 1 to 30)     | 220                        | 26                     | 679,7                  | 19       |
| Month 2 (day 31 to 60)    | 1383                       | 217                    | 2997,6                 | 8        |
| Month 3 (day 61 to 90)    | 1603                       | 1304                   | 3481                   | 5        |
| Month 4 (day 91 to 120)   | 500                        | 250                    | 1725,9                 | 10       |
| Month 5 (day 121 to 150)  | 976                        | 203                    | 1749,1                 | 6        |
| Month 6 (day 151 to 180)  | 2057                       | 763                    | 3849                   | 4        |
| Month 7 (day 181 to 210)  | 624                        | 306                    | 877                    | 9        |
| Month 8 (day 211 to 240)  | 88                         | 88                     | 88                     | 1        |
| Month 9 (day 241 to 270)  | 216                        | 162                    | 2088                   | 4        |
| Month 10 (day 271 to 300) | 3349                       | 816                    | 6007                   | 4        |
| Month 11 (day 301 to 330) | 1888                       | 1013                   | 2764                   | 2        |
| Month 12 (day 331 to 360) | 3524                       | 2068                   | 4980                   | 2        |
| > Month 12 (> day 361)    | 5507                       | 553                    | 6836                   | 7        |

**Table S3.** Classification of the severity of COVID-19 (WHO classification).

| <b>Severity of COVID-19</b>              |                                                                                                                                                                                                                                                                    |
|------------------------------------------|--------------------------------------------------------------------------------------------------------------------------------------------------------------------------------------------------------------------------------------------------------------------|
| Asymptomatic or presymptomatic infection | Individuals who test positive for SARS-CoV-2 using a virologic test (i.e., a nucleic acid amplification test [NAAT] or an antigen test) but who have no symptoms that are consistent with COVID-19.                                                                |
| Mild illness                             | Individuals who have any of the various signs and symptoms of COVID-19 (e.g., fever, cough, sore throat, malaise, headache, muscle pain, nausea, vomiting, diarrhea, loss of taste and smell) but who do not have shortness of breath or abnormal chest imaging.   |
| Moderate illness                         | Individuals who show evidence of lower respiratory disease during clinical assessment or imaging and who have an oxygen saturation measured by pulse oximetry (SpO <sub>2</sub> ) ≥94% on room air at sea level.                                                   |
| Severe illness                           | Individuals who have SpO <sub>2</sub> <94% on room air at sea level, a ratio of arterial partial pressure of oxygen to fraction of inspired oxygen (PaO <sub>2</sub> /FiO <sub>2</sub> ) <300 mm Hg, a respiratory rate >30 breaths/min, or lung infiltrates >50%. |
| Critical illness                         | Individuals who have respiratory failure, septic shock, and/or multiple organ dysfunction.                                                                                                                                                                         |
